# Supplementary material for: Gut Microbiota-Derived Small Extracellular Vesicles Endorse Memory-like Inflammatory Responses in Murine Neutrophils
Source: MDPI journal article supplement (doi:10.3390/biomedicines10020442), 2022-02-14
Supplement: s1 [file s1]

## Supplementary Figures

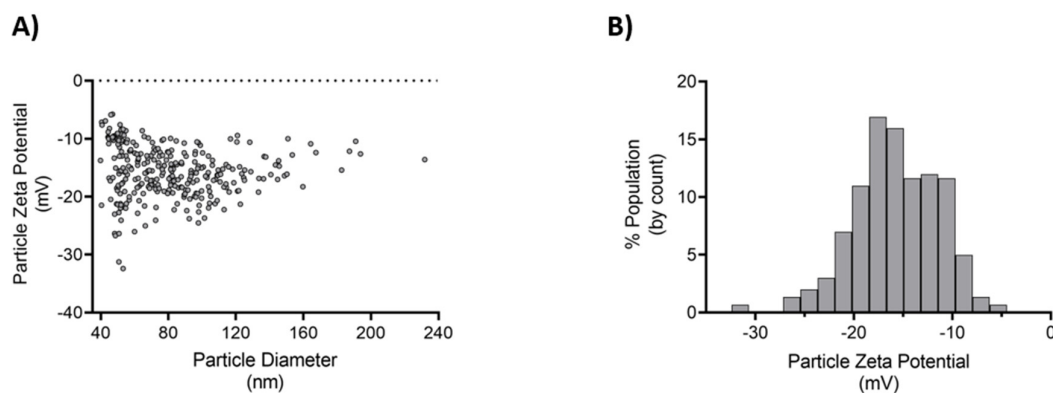

**Supplementary Figure S1.** Characterization of zeta potential and population of microbiota-derived small EVs by TRPS. Small EVs isolated from the stool of mice from the caecum and colon using qEV columns were further analyzed for their (A) zeta potential and (B) population distribution by TRPS technique. Data are shown as XY scatter plots.

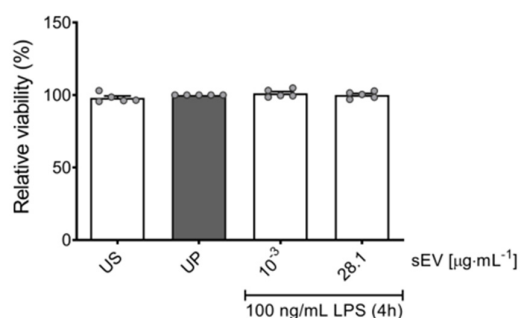

**Supplementary Figure S2.** Analysis of cell viability of murine neutrophils primed by microbiota-derived small EVs. Murine bone marrow neutrophils were primed for 45 min by microbiota-derived small EVs (low concentration: 1 ng/mL; high concentration: 28,1  $\mu\text{g}/\text{mL}$ ) and re-challenged by 100 ng/mL LPS for 4h on day 2. Analysis of (A) cell viability ( $n=5$ ) was performed by MTT assay, as described in the method section. Data are shown as scatter dot plots (UP group assigned as 100%), mean + SEM.
